# Supplementary material for: A ferritin mediated photochemical method to synthesize biocompatible catalytically active gold nanoparticles: size control synthesis for small (∼2 nm), medium (∼7 nm) or large (∼17 nm) nanoparticles
Source: Royal Society of Chemistry journal article supplement (doi:10.1039/c3ra46520a), 2013-12-03
Supplement: c3ra46520a.pdf [file c3ra46520a.pdf]

# Supplementary Fig.1

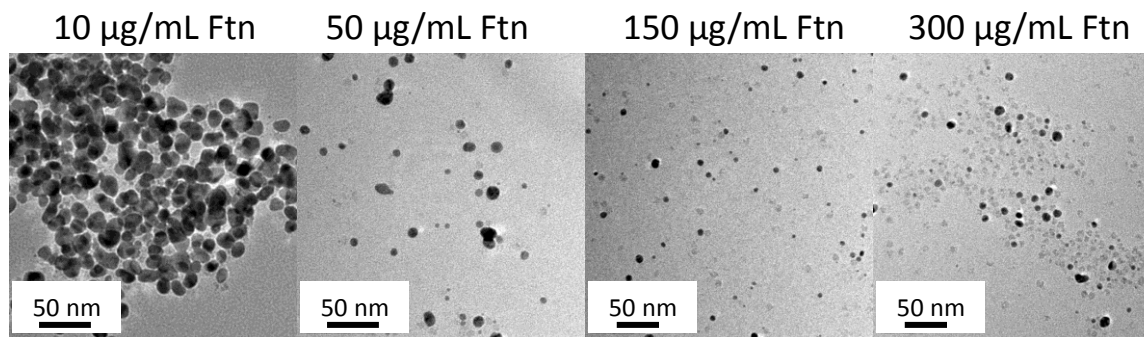

**Supplementary figure 1.** TEM images of the AuNPs at increasing concentrations of Ftn (left to right). Lower concentrations of ferritin (Ftn) form aggregates of larger particles (10 µg/mL Ftn) and few large ovoidal particles (50 µg/mL Ftn). Higher concentrations of Ftn form large numbers of small spherical or quasi-spherical particles.

# Supplementary Fig.2

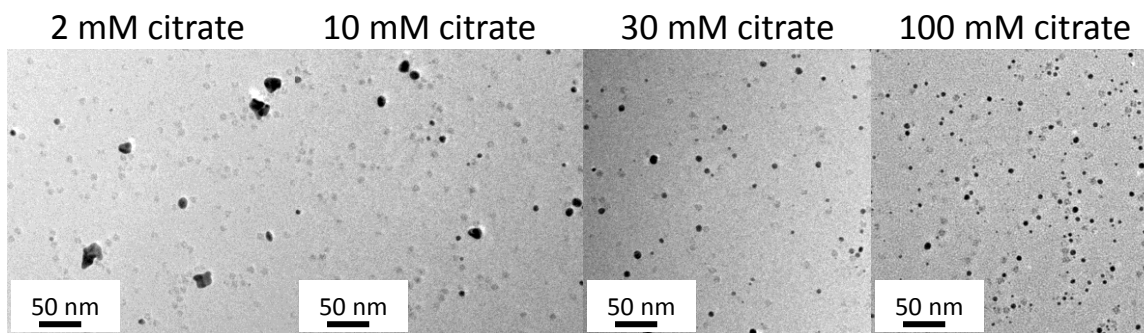

**Supplementary figure 2.** TEM images of the AuNPs at increasing concentrations of citrate (left to right). Lower concentrations of citrate form few large irregularly-shaped particles. Higher concentrations of citrate form large numbers of small spherical or quasi-spherical particles.

# Supplementary Fig.3

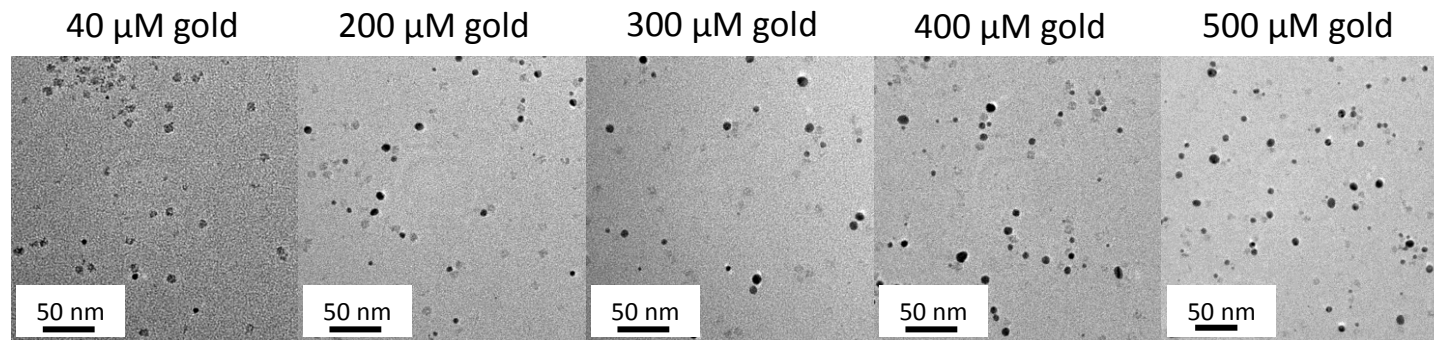

**Supplementary figure 3.** TEM images of the AuNPs at increasing concentrations of  $\text{Au}^{3+}$  (left to right). Lower concentrations of  $\text{Au}^{3+}$  form few smaller particles. Higher concentrations of  $\text{Au}^{3+}$  form large numbers of particles with a slight increase in size. In each figure there are very dark nanoparticles (gold) and more faint nanoparticles (the iron core of ferritin). Most of the particles visible in the 40  $\mu\text{M}$  gold (far left) are the Ftn iron cores (better distinguishable in figure 7).

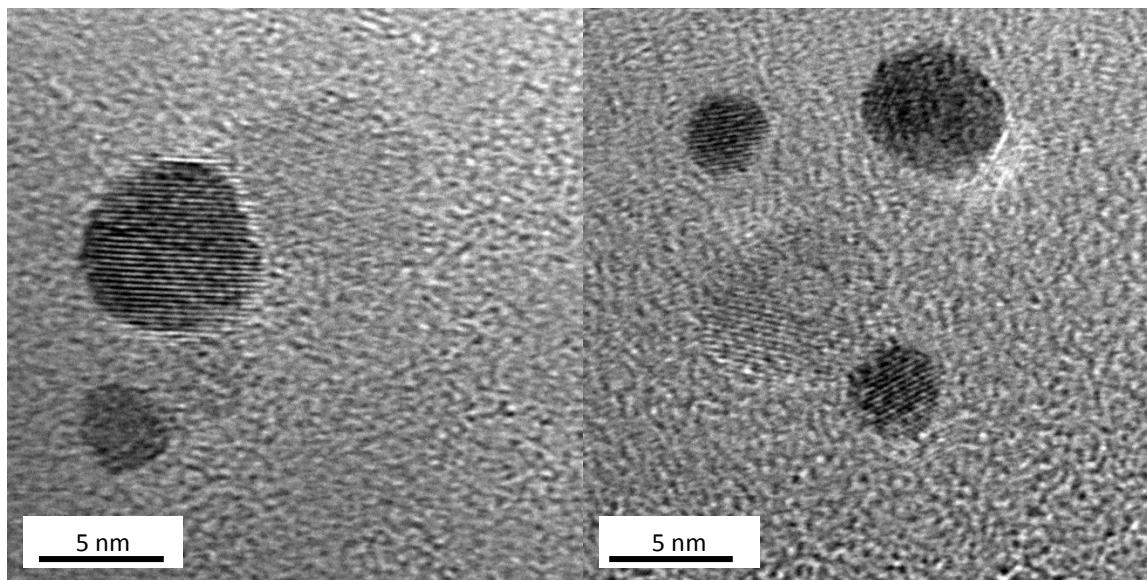

**Supplementary figure 4.** Single-crystal nanoparticles. These images show two types of nanoparticles: the lighter ones are the iron cores of ferritin; the darker ones are AuNPs. The horizontal lines present on the AuNPs represent the atomic planes of the gold fcc crystal lattice.
